# Supplementary material
Source: Springer Nature journal article supplement (https://www.springermedizin.de/resource/supplementary/13063_2013_1938_MOESM1_ESM.pdf/9621954)
Supplement: MOESM1 [file 9621954]

All IORGs in the United States  
N = 3903

Stratum 1:  
Top 200 NIH-funded institutions

Stratum 2:  
Remainder of IORGs  
N = 3713

All IORGs included  
N = 190

Random sample  
n = 210

Excluded:  
- no contact info: 2

Excluded:  
- non-biomedical: 95  
- no contact info: 3

Surveyed  
n = 188

Surveyed  
n = 112

Excluded:  
- Ineligible: 15  
- Undeliverable: 1

Excluded:  
- Ineligible: 12  
- Undeliverable: 6

**Response rate: 62/172 = 36.0%**  
- Declined: 6  
- No response: 104  
- Respondents: 62

**Response rate: 24/95 = 25.5%**  
- Declined: 4  
- No response: 66  
- Respondents: 24
